# Supplementary material
Source: PubMed Central journal article supplement (PMC7871170)
Supplement: NIHMS1660007-supplement-Supplemental_Publication_Material.pdf [file NIHMS1660007-supplement-Supplemental_Publication_Material.pdf]

## SUPPLEMENTAL MATERIAL

Table I: Troponin assays and centers

| Location                       | Assay      | Manufacturer and Assay                                  | Coefficient of variation* | 99th percentile/ULN, ng/L | Limit of detection, ng/L** | Limit of Quantitation, ng/L | High sensitivity assay | Number of subjects | Mortality [N (%)] |
|--------------------------------|------------|---------------------------------------------------------|---------------------------|---------------------------|----------------------------|-----------------------------|------------------------|--------------------|-------------------|
| Howard County General Hospital | Troponin T | Roche Diagnostics Cobas 6000 Elecsys Troponin T STAT    | 1.3-15.7%                 | 10                        | 10                         | 30                          | No                     | 43                 | 15 (34.9)         |
| Suburban Hospital              | Troponin T | Roche Diagnostics Cobas 6000 Elecsys Troponin T STAT    | 1.3-15.7%                 | 10                        | 10                         | 30                          | No                     | 69                 | 35 (50.7)         |
| Bayview Medical Center         | Troponin I | Siemens Dimension Vista 1500 Troponin I Beckman         | 2.9-6.6%                  | 45                        | 15                         | 40                          | No                     | 10                 | 1 (10.0)          |
| Johns Hopkins Hospital***      | Troponin I | Coulter Access 2 AccuTnl+3 Troponin I Ortho Vitros 5600 | 5-7%                      | 20                        | 40                         | 40                          | No                     | 109                | 31 (28.4)         |
| Sibley Memorial Hospital       | Troponin I | Integrated System Troponin I                            | 2.2-12.5%                 | 34                        | 10                         | 12                          | No                     | 12                 | 6 (50.0)          |
| MI-ARDS Study                  | Troponin I | Abbott ARCHITECT                                        | 2.4-4.9%                  | 26                        | 2                          | 3.5                         | Yes                    | 506                | 134 (26.5)        |

|                                        |  |  |
|----------------------------------------|--|--|
| STAT High<br>Sensitivity<br>Troponin I |  |  |
|----------------------------------------|--|--|

\*Manufacturers'  
reported within-  
lab or total  
precision  
\*\*Location  
reported cutoff  
\*\*\*For this site  
the URL is the limit  
of detection (limit  
of quantitation)

Table II: missing data prior to multiple imputation

| Variable                                  | Missing | Percent missing | Imputed |
|-------------------------------------------|---------|-----------------|---------|
| Age (y)                                   | 0       | 0               |         |
| Female sex                                | 0       | 0               |         |
| Chronic lung disease                      | 0       | 0               |         |
| Congestive heart failure                  | 0       | 0               |         |
| Chronic immunodeficiency                  | 0       | 0               |         |
| Chronic liver disease                     | 0       | 0               |         |
| Obesity                                   | 0       | 0               |         |
| Diabetes with complication                | 0       | 0               |         |
| Chronic kidney disease                    | 0       | 0               |         |
| Temperature (C)                           | 3       | 1.23            | *       |
| Heart rate (beats per minute)             | 3       | 1.23            | *       |
| Systolic BP (mmHg)                        | 3       | 1.23            | *       |
| Diastolic BP (mmHg)                       | 3       | 1.23            | *       |
| Vasopressor use                           | 0       | 0               |         |
| Weight (kg)                               | 37      | 15.2            | *       |
| Body-mass index                           | 43      | 17.3            | *       |
| Height (cm)                               | 11      | 4.5             | *       |
| Tidal volume (mL)                         | 67      | 27.6            | *       |
| Positive end-expiratory pressure (cm H2O) | 48      | 19.8            | *       |
| Plateau pressure (cm H2O)                 | 74      | 30.5            | *       |
| Driving pressure (cmH2O)                  | 75      | 30.9            | *       |
| FiO2 (fraction)                           | 52      | 21.4            | *       |
| PaO2/FiO2 ratio                           | 104     | 43.7            | *       |
| Lung compliance (mL/cm H2O)               | 83      | 34.2            | *       |
| Minute ventilation (L/min)                | 48      | 19.8            | *       |

|                             |     |      |   |
|-----------------------------|-----|------|---|
| pH                          | 64  | 26.3 | * |
| pCO2 (mmHg)                 | 64  | 26.3 | * |
| pO2 (mmHg)                  | 64  | 26.3 | * |
| Creatinine (mg/dL)          | 3   | 1.2  | * |
| Bilirubin                   | 9   | 3.7  | * |
| Lactate                     | 84  | 34.6 | * |
| Hemoglobin                  | 3   | 1.23 | * |
| Hematocrit                  | 3   | 1.23 | * |
| Troponin                    | 0   | 0    |   |
| White blood cell count      | 3   | 1.23 | * |
| Platelets                   | 3   | 1.23 | * |
| SvO2                        | 138 | 56.8 |   |
| Interleukin-6               | 199 | 81.9 |   |
| Ferritin                    | 57  | 23.5 | * |
| Fibrinogen                  | 138 | 56.8 |   |
| D-dimer                     | 32  | 13.2 | * |
| C reactive protein          | 39  | 16   | * |
| Death                       | 0   | 0    |   |
| Ventilator-free days (days) | 0   | 0    |   |

Table III: Demographics of intubated COVID-19 patients with versus without troponin checked

|                                | Total            | No troponin checked | Troponin checked | P     |
|--------------------------------|------------------|---------------------|------------------|-------|
| Number                         | 328              | 85 (25.9)           | 243 (74.1)       |       |
| Age (y)                        | 64.5 (53.7-73.0) | 64.9 (55.3-75.8)    | 64.0 (53.6-72.6) | 0.41  |
| Female sex (%)                 | 127 (38.7)       | 32 (37.7)           | 95 (39.1)        | 0.81  |
| Hispanic ethnicity (%)         | 78 (23.8)        | 24 (28.2)           | 54 (22.2)        | 0.26  |
| African-American race (%)      | 127 (38.7)       | 41 (48.2)           | 86 (35.4)        | 0.036 |
| Chronic lung disease (%)       | 73 (22.3)        | 19 (22.4)           | 54 (22.2)        | 0.98  |
| Congestive heart failure (%)   | 92 (28.1)        | 22 (25.9)           | 70 (28.8)        | 0.61  |
| Hypertension (%)               | 204 (62.2)       | 56 (65.9)           | 148 (60.9)       | 0.42  |
| Diabetes with complication (%) | 67 (20.4)        | 20 (23.5)           | 47 (19.3)        | 0.41  |
| Chronic kidney disease (%)     | 59 (18.)         | 10 (11.8)           | 49 (20.2)        | 0.083 |
| Death (%)                      | 121 (36.9)       | 33 (38.8)           | 88 (36.2)        | 0.67  |
| Renal replacement (%)          | 58 (17.7)        | 17 (20.0)           | 41 (16.9)        | 0.52  |
| Vasopressors (%)               | 278 (84.8)       | 66 (77.7)           | 212 (87.2)       | 0.034 |

Data shown as N (%) and median (inter-quartile range)

Table IV: Comparison of patients with troponin I assessed versus troponin T

|                                | Troponin I       | Troponin T       | P      |
|--------------------------------|------------------|------------------|--------|
| Number                         | 131 (53.9)       | 112 (46.1)       |        |
| Age (y)                        | 61.1 (49.5-70.7) | 67.4 (57.8-78.1) | 0.0008 |
| Female sex (%)                 | 55 (42.0)        | 40 (35.7)        | 0.32   |
| Hispanic ethnicity (%)         | 34 (26.0)        | 20 (17.9)        | 0.13   |
| African-American race (%)      | 49 (37.4)        | 37 (33.0)        | 0.48   |
| Chronic lung disease (%)       | 26 (19.9)        | 28 (25.)         | 0.34   |
| Congestive heart failure (%)   | 42 (32.1)        | 28 (25.)         | 0.23   |
| Hypertension (%)               | 71(54.2)         | 77 (68.8)        | 0.02   |
| Diabetes with complication (%) | 20 (15.3)        | 27 (24.1)        | 0.082  |
| Chronic kidney disease (%)     | 22 (16.8)        | 27 (24.1)        | 0.16   |
| Death (%)                      | 38 (29.0)        | 50 (44.6)        | 0.011  |
| Renal replacement (%)          | 25 (19.1)        | 16 (14.3)        | 0.32   |
| Vasopressors (%)               | 120 (91.6)       | 92 (82.1)        | 0.028  |

Data shown as N (%) and median (inter-quartile range)

Table V: Factors associated with log- transformed troponin levels. Adjusted models include age, sex, and creatinine

|                                           | Univariable     |         | Adjusted        |       |                                           | Univariable     |         | Adjusted       |       |
|-------------------------------------------|-----------------|---------|-----------------|-------|-------------------------------------------|-----------------|---------|----------------|-------|
|                                           | B (se)          | P       | B (se)          | P     |                                           | B (se)          | P       | B (se)         | P     |
| Troponin T                                |                 |         |                 |       | Troponin I                                |                 |         |                |       |
| Age (y)                                   | 0.041 (0.0093)  | <0.001  |                 |       | Age (y)                                   | 0.033 (0.0099)  | 0.001   |                |       |
| Female sex                                | 0.25 (0.29)     | 0.4     |                 |       | Female sex                                | 0.14 (0.30)     | 0.65    |                |       |
| Hispanic ethnicity                        | -0.61 (0.36)    | 0.095   |                 |       | Hispanic ethnicity                        | -0.031 (0.34)   | 0.94    |                |       |
| African-American race                     | -0.46 (0.30)    | 0.13    |                 |       | African-American race                     | 0.26 (0.31)     | 0.39    |                |       |
| Chronic lung disease                      | -0.35 (0.32)    | 0.28    |                 |       | Chronic lung disease                      | 0.29 (0.37)     | 0.43    |                |       |
| Congestive heart failure                  | 0.26 (0.32)     | 0.42    | -0.026 (0.28)   | 0.93  | Congestive heart failure                  | 0.80 (0.32)     | 0.01    | 0.50 (0.31)    | 0.11  |
| Hypertension                              | 0.60 (0.30)     | 0.046   | 0.00036 (0.28)  | 0.99  | Hypertension                              | 0.23 (0.30)     | 0.44    | -0.11 (0.29)   | 0.7   |
| Diabetes with complication                | 0.10 (0.33)     | 0.75    | 0.11 (0.28)     | 0.69  | Diabetes with complication                | 1.0 (0.40)      | 0.013   | 0.70 (0.39)    | 0.075 |
| Chronic kidney disease                    | 1.71 (0.29)     | <0.0001 | 0.96 (0.34)     | 0.006 | Chronic kidney disease                    | 1.72 (0.38)     | <0.0001 | 1.51 (0.53)    | 0.005 |
| Temperature (C)                           | -0.27 (0.12)    | 0.022   | -0.20 (0.11)    | 0.058 | Temperature (C)                           | -0.15 (0.15)    | 0.32    | 0.01 (0.15)    | 0.95  |
| Heart rate (beats per minute)             | 0.0042 (0.0067) | 0.53    |                 |       | Heart rate (beats per minute)             | 0.01 (0.0076)   | 0.19    |                |       |
| Systolic BP (mmHg)                        | -0.012 (0.008)  | 0.15    | -0.0038 (0.007) | 0.59  | Systolic BP (mmHg)                        | -0.027 (0.01)   | 0.01    | -0.016 (0.01)  | 0.12  |
| Diastolic BP (mmHg)                       | -0.035 (0.016)  | 0.034   |                 |       | Diastolic BP (mmHg)                       | -0.026 (0.018)  | 0.15    |                |       |
| Respiratory rate (breaths per minute)     | -0.013 (0.019)  | 0.51    |                 |       | Respiratory rate (breaths per minute)     | 0.017 (0.022)   | 0.43    |                |       |
| Vasopressor use                           | -0.14 (0.37)    | 0.69    |                 |       | Vasopressor use                           | 0.061 (0.55)    | 0.91    |                |       |
| Weight (kg)                               | -0.01 (0.005)   | 0.05    | -0.003 (0.005)  | 0.51  | Weight (kg)                               | -0.003 (0.006)  | 0.58    | 0.001 (0.006)  | 0.87  |
| Body-mass index (kg/m2)                   | -0.031 (0.017)  | 0.071   |                 |       | Body-mass index (kg/m2)                   | -0.018 (0.19)   | 0.35    |                |       |
| Tidal volume (mL)                         | 0.0017 (0.003)  | 0.54    |                 |       | Tidal volume (mL)                         | 0.0039 (0.0024) | 0.11    |                |       |
| Positive end-expiratory pressure (cm H2O) | -0.047 (0.036)  | 0.2     | -0.022 (0.033)  | 0.5   | Positive end-expiratory pressure (cm H2O) | -0.073 (0.04)   | 0.068   | -0.041 (0.039) | 0.3   |
| Driving pressure (cmH2O)                  | -0.0057 (0.012) | 0.64    |                 |       | Driving pressure (cmH2O)                  | 0.0068 (0.009)  | 0.45    |                |       |
| Lung compliance (mL/cm H2O)               | 0.0029 (0.009)  | 0.74    |                 |       | Lung compliance (mL/cm H2O)               | 0.0052 (0.016)  | 0.75    |                |       |
| Minute ventilation (L/min)                | 0.0058 (0.005)  | 0.22    |                 |       | Minute ventilation (L/min)                | 0.0039 (0.016)  | 0.81    |                |       |
| pH                                        | -0.13 (1.33)    | 0.92    |                 |       | pH                                        | -2.12 (1.67)    | 0.21    |                |       |
| pCO2 (mmHg)                               | -0.02 (0.012)   | 0.1     | -0.0068 (0.01)  | 0.51  | pCO2 (mmHg)                               | -0.013 (0.012)  | 0.3     | 0.0001 (0.012) | 0.99  |
| pO2 (mmHg)                                | 0.0025 (0.004)  | 0.53    |                 |       | pO2 (mmHg)                                | 0.0032 (0.005)  | 0.56    |                |       |
| PaO2/FiO2 ratio                           | -0.0003 (0.002) | 0.9     |                 |       | PaO2/FiO2 ratio                           | 0.0015 (0.0024) | 0.54    |                |       |



|                                         |                    |        |                   |       |                                         |                     |        |                   |       |
|-----------------------------------------|--------------------|--------|-------------------|-------|-----------------------------------------|---------------------|--------|-------------------|-------|
| Creatinine (mg/dL)                      | 0.36 (0.07)        | <0.001 |                   |       | Creatinine (mg/dL)                      | 0.14 (0.045)        | 0.002  |                   |       |
| Bilirubin (mg/dL)                       | 0.21 (0.36)        | 0.55   |                   |       | Bilirubin (mg/dL)                       | 0.40 (0.24)         | 0.1    |                   |       |
| Lactate (mmol/L)                        | 0.58 (0.048)       | 0.23   | 0.032 (0.04)      | 0.43  | Lactate (mmol/L)                        | 0.20 (0.049)        | <0.001 | 0.15 (0.05)       | 0.003 |
| Hemoglobin (g/dL)                       | -0.22 (0.065)      | 0.001  |                   |       | Hemoglobin (g/dL)                       | -0.17 (0.069)       | 0.013  |                   |       |
| Hematocrit (%)                          | -0.063 (0.22)      | 0.005  | -0.035 (0.02)     | 0.081 | Hematocrit (%)                          | -0.049 (0.023)      | 0.035  | -0.031 (0.024)    | 0.19  |
| Central venous saturation (%)           | 0.015 (0.019)      | 0.46   |                   |       | Central venous saturation (%)           | -0.0073 (0.0083)    | 0.38   |                   |       |
| White blood cell count (1000 cells/mm3) | 0.058 (0.023)      | 0.014  | 0.64 (0.02)       | 0.002 | White blood cell count (1000 cells/mm3) | 0.023 (0.025)       | 0.36   | 0.023 (0.023)     | 0.31  |
| Platelets (100 cells/mm3)               | -0.002 (0.001)     | 0.13   | -0.0002 (0.001)   | 0.87  | Platelets (100 cells/mm3)               | -0.0046 (0.0015)    | 0.003  | -0.0029 (0.002)   | 0.053 |
| Interleukin-6 (pg/mL)                   | 0.0011 (0.0028)    | 0.7    |                   |       | Interleukin-6 (pg/mL)                   | 0.00012 (0.0007)    | 0.87   |                   |       |
| Ferritin (ng/mL)                        | 0.000066 (0.00002) | 0.001  | 0.00005 (0.00002) | 0.005 | Ferritin (ng/mL)                        | 0.000054 (0.000015) | <0.001 | 0.00004 (0.00002) | 0.008 |
| Fibrinogen (mg/dL)                      | -0.0023 (0.0013)   | 0.09   | -0.0015 (0.001)   | 0.2   | Fibrinogen (mg/dL)                      | -0.0038 (0.001)     | 0.001  | -0.0025 (0.001)   | 0.022 |
| D-dimer (mcg/mL)                        | 0.0088 (0.018)     | 0.63   |                   |       | D-dimer (mcg/mL)                        | 0.027 (0.02)        | 0.17   |                   |       |
| C-reactive protein (mg/dL)              | 0.001 (0.0013)     | 0.44   |                   |       | C-reactive protein (mg/dL)              | 0.0001 (0.003)      | 0.97   |                   |       |
